# Supplementary material for: Effectiveness of Opioid Switching in Advanced Cancer Pain: A Prospective Observational Cohort Study
Source: MDPI journal article supplement (doi:10.3390/cancers15143676), 2023-07-19
Supplement: s1 [file s1]

| Edmonton Symptom Assessment Scale<br>(ESAS) |                     |       | Control         |                 |         | Switch          |                 |         |
|---------------------------------------------|---------------------|-------|-----------------|-----------------|---------|-----------------|-----------------|---------|
|                                             | Items               | PSG * | T0 Median (IQR) | T1 Median (IQR) | P value | T0 Median (IQR) | T1 Median (IQR) | P value |
|                                             | Pain                | 3     | 3 (1,5)         | 3 (2,6)         | 1       | 4 (2.3,6.8)     | 3 (2,5)         | <0.05   |
|                                             | Tiredness           | 3     | 6 (3,8)         | 4 (3.3,8)       | 0.70    | 7 (5.5,8)       | 6 (3,8)         | <0.05   |
|                                             | Drowsiness          | 2     | 4 (2,7)         | 4 (2,7)         | 0.55    | 6 (4,8)         | 4 (2,7)         | 0.18    |
|                                             | Nausea              | 1     | 1 (1,1)         | 1 (1,1)         | 0.21    | 2 (1,4)         | 1 (1,3)         | 0.28    |
|                                             | Appetite            | 3     | 1 (1,5)         | 1.5 (1,4.8)     | 0.15    | 4 (2.3,8)       | 5 (1,7)         | 0.68    |
|                                             | Shortness of Breath | 2     | 1 (1,6.3)       | 1 (1,4.75)      | 0.34    | 4 (1,5)         | 2 (1,7)         | 0.97    |
|                                             | Depression          | 2     | 1 (1,5)         | 1.5 (1,5)       | 0.55    | 4 (2,6.8)       | 2 (1,5)         | 0.23    |
|                                             | Anxiety             | 2     | 3 (1,5)         | 1.5 (1,4.5)     | 0.12    | 2 (1,5.8)       | 2 (1,5)         | 0.78    |
|                                             | Wellbeing           | 2     | 5 (3,7)         | 5 (2.8,7)       | 0.76    | 5 (4,5.5)       | 5 (3,6)         | 0.70    |

\*PSG = Personalised Symptom Goal

**Supplementary Table S1: Comparison of Adverse Event scores Across Opioid Switch and Control Groups at T0 and T1**
